# Supplementary material for: Predicting hERG channel blockers with directed message passing neural networks
Source: Royal Society of Chemistry journal article supplement (doi:10.1039/d1ra07956e), 2022-01-01
Supplement: d1ra07956e1.pdf [file d1ra07956e1.pdf]

# Supplemental Material

## Predicting hERG Channel Blockers with Directed Message Passing Neural Networks

*Mengyi Shan,<sup>//,†</sup> Chen Jiang,<sup>//, ‡</sup> Jing Chen,<sup>†, ⊥</sup> Lu-Ping Qin,<sup>\*, †</sup> Jiang-Jiang Qin,<sup>\*, §</sup>  
and Gang Cheng<sup>\*, †</sup>*

### Table of content

|                                                                                                                                          |     |
|------------------------------------------------------------------------------------------------------------------------------------------|-----|
| <b>Table S1.</b> Detailed description of the all databases. ....                                                                         | 2   |
| <b>Figure S1.</b> Two-dimensional principal component analysis plots based on Cai's, Siramshetty's and Hou's data sets. ....             | 3   |
| <b>Figure S2.</b> Two-dimensional principal component analysis plots based on blocker, NA and non-blocker. ....                          | 3-4 |
| <b>Table S2.</b> The 206 descriptors in moe206. ....                                                                                     | 5-7 |
| <b>Table S3.</b> The 53 descriptors in MOE53. ....                                                                                       | 8   |
| <b>Figure S3.</b> The prediction probability distribution of hERG blockers for Cai's dataset (at threshold = 10 $\mu$ M) by D-MPNN. .... | 9   |
| <b>Figure S4.</b> Comparing the chemical properties of blockers and non-blockers. ....                                                   | 10  |
| <b>Table S4.</b> The full name, bits and source of the descriptors. ....                                                                 | 11  |

For a better understanding of Table 1 and Table 2, we sorted out the size, the ratio of blockers to non-blockers and the source of the whole database used in the article in Table S1.

**Table S1.** Detailed description of the all databases.

| Refs.                           | Dataset                                                |                                                  |                               | Data source                                                                                                     |
|---------------------------------|--------------------------------------------------------|--------------------------------------------------|-------------------------------|-----------------------------------------------------------------------------------------------------------------|
|                                 | training                                               | test                                             | validation                    |                                                                                                                 |
| Cai et al. <sup>1</sup>         | size: 6311<br>(P: N=3,485 : 2826)                      | size: 789<br>(P: N=435 : 354)                    | size: 789<br>(P: N=435 : 354) | ChEMBL(patch-clamp), radioligand binding measurements, hERG K+ channel binding affinity, and literature derived |
| Doddareddy et al. <sup>2</sup>  | D3 training<br>size: 2389<br>(P: N=1,004 : 1,385)      | D3 test<br>size: 155<br>(P: N=108 : 147)         |                               | literature derived                                                                                              |
| Siramshetty et al. <sup>3</sup> | training<br>size: 8154<br>(P: N=2,164:5, 990)          | validation<br>size: 839<br>(P: N=53 : 786)       |                               | ChEMBL (multiple), NCATS (flux assay), FDA Pharmacological and Safety Reviews (patch-clamp)                     |
|                                 | training<br>size: 8154<br>(P: N=2,164:5, 990)          | FDA-1<br>size: 177<br>(P: N=15 : 162)            |                               |                                                                                                                 |
| Hou et al. <sup>4</sup>         | training I<br>size: 392<br>(P: N=352 : 40)             | test I<br>size: 195<br>(P: N=175 : 20)           |                               | patch-clamp                                                                                                     |
|                                 | training II<br>size: 392<br>(P: N=352 : 40)            | test II<br>size: 195<br>(P: N=175 : 20)          |                               |                                                                                                                 |
| Ogura et al. <sup>5</sup>       | training<br>size: 203, 941<br>(P: N=6, 923 : 196, 918) | test<br>size: 87, 361<br>(P: N=2, 966 : 84, 395) |                               | ChEMBL, GOSTAR, NCGC, hERGCentral, hERG integrated dataset                                                      |
| Karim et al. <sup>6</sup>       | training<br>size: 12620<br>(P: N=6,643 : 5, 977)       | Test-set I<br>size: 44<br>(P: N=30 : 14)         |                               | BindingDB database, ChEMBL, and literature derived                                                              |
|                                 | training<br>size: 12620<br>(P: N=6,643 : 5, 977)       | Test-set II<br>size: 44<br>(P: N=11 : 30)        |                               |                                                                                                                 |
|                                 | training<br>size: 12620<br>(P: N=6,643 : 5, 977)       | Test-set III<br>size: 740<br>(P: N=30 : 710)     |                               |                                                                                                                 |

P: Positive; N: Negative; NCATS: National Center for Advancing Translational Sciences; NCGC:

NIH Chemical Genomics Center.

The predictive ability and applicable scope of the model are greatly related to the chemical spatial diversity of the data set. To visualize the distribution of datasets in the chemical space, two-dimensional (2D) principal component analysis<sup>7</sup> (PCA) was employed on different datasets with ECFP descriptors as input. As shown in Figure S1, high chemical diversity and overlap among the compounds within Cai's<sup>1</sup>, Siramshetty's<sup>3</sup> and Hou's<sup>4</sup> datasets reflects the effectiveness of the applicability domain of the model.<sup>8</sup> Moreover, the PCA approach was also implemented on the Cai's, Siramshetty's and Hou's dataset with threshold values of 20  $\mu\text{M}$  in Figure S2 to indicate that ECFP contribute to distinguishing the blockers and non-blockers to some extent.

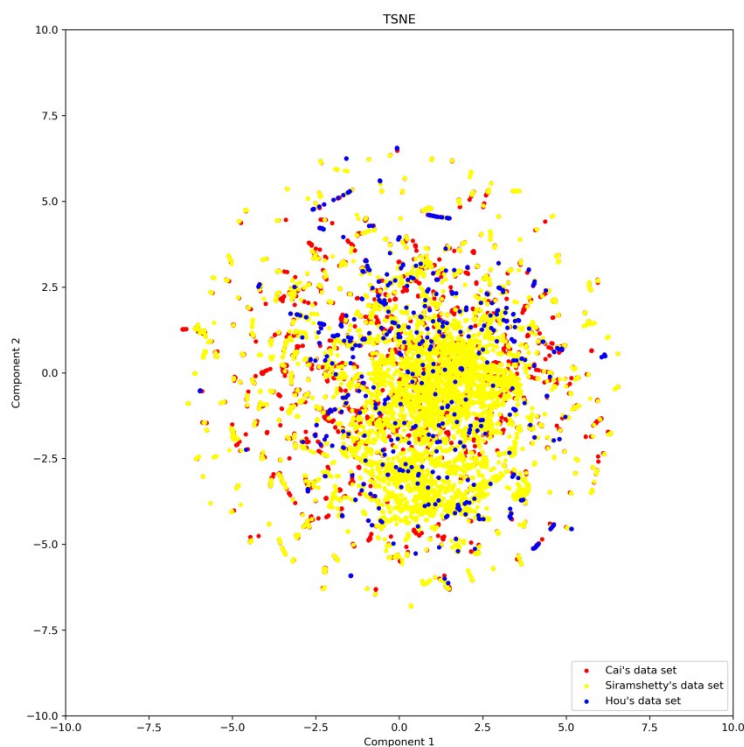

**Figure S1.** Two-dimensional principal component analysis plots based on Cai's (red), Siramshetty's (blue) and Hou's data sets (yellow).

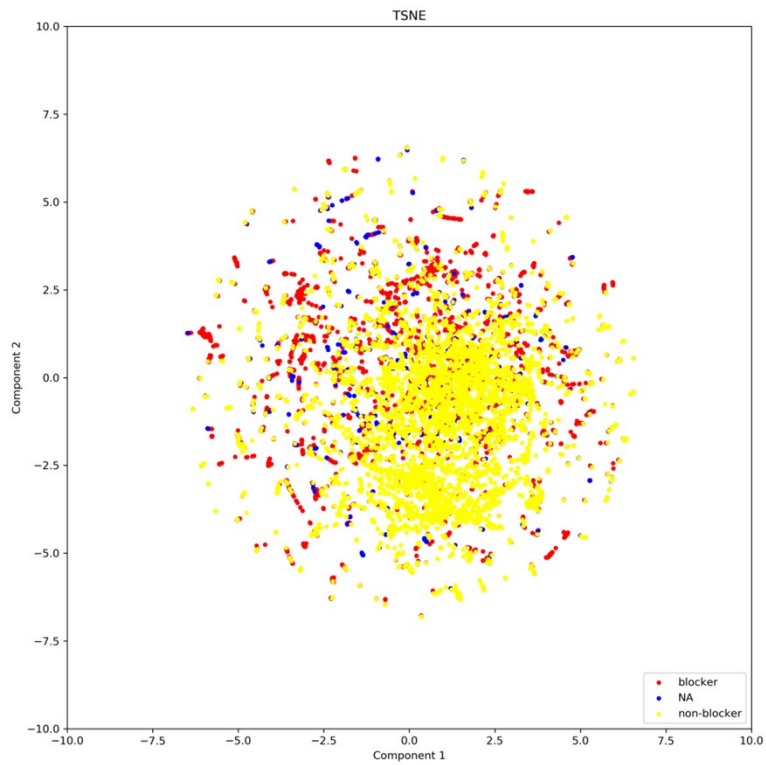

**Figure S2.** Two-dimensional principal component analysis plots based on blocker (red), NA (blue) and non-blocker (yellow). NA: not available

**Table S2.** The 206 descriptors in moe206.

| descriptor        | description                                    | descriptor   | description                                 |
|-------------------|------------------------------------------------|--------------|---------------------------------------------|
| apol              | Sum of atomic polarizabilities                 | vdw_vol      | Van der Waals volume (A**3)                 |
| ast_fraglike      | Astex Fragment-like Test                       | BCUT_PEOE_0  | PEOE Charge BCUT (0/3)                      |
| ast_fraglike_ext  | Astex Fragment-like Test (Extended)            | BCUT_PEOE_1  | PEOE Charge BCUT (1/3)                      |
| ast_violation     | Astex Fragment-like Violation Count            | BCUT_PEOE_2  | PEOE Charge BCUT (2/3)                      |
| ast_violation_ext | Astex Fragment-like Violation Count (Extended) | BCUT_PEOE_3  | PEOE Charge BCUT (3/3)                      |
| a_acc             | Number of H-bond acceptor atoms                | BCUT_SLOGP_0 | LogP BCUT (0/3)                             |
| a_acid            | Number of acidic atoms                         | BCUT_SLOGP_1 | LogP BCUT (1/3)                             |
| a_aro             | Number of aromatic atoms                       | BCUT_SLOGP_2 | LogP BCUT (2/3)                             |
| a_base            | Number of basic atoms                          | BCUT_SLOGP_3 | LogP BCUT (3/3)                             |
| a_count           | Number of atoms                                | BCUT_SMR_0   | Molar Refractivity BCUT (0/3)               |
| a_don             | Number of H-bond donor atoms                   | BCUT_SMR_1   | Molar Refractivity BCUT (1/3)               |
| a_donacc          | Number of H-bond donor + acceptor atoms        | BCUT_SMR_2   | Molar Refractivity BCUT (2/3)               |
| a_heavy           | Number of heavy atoms                          | BCUT_SMR_3   | Molar Refractivity BCUT (3/3)               |
| a_hyd             | Number of hydrophobic atoms                    | bpol         | Difference of bonded atom polarizabilities  |
| a_IC              | Atom information content (total)               | b_1rotN      | Number of rotatable single bonds            |
| a_ICM             | Atom information content (mean)                | b_1rotR      | Fraction of rotatable single bonds          |
| a_nB              | Number of boron atoms                          | b_ar         | Number of aromatic bonds                    |
| a_nBr             | Number of bromine atoms                        | b_count      | Number of bonds                             |
| a_nC              | Number of carbon atoms                         | b_double     | Number of double bonds                      |
| a_nCl             | Number of chlorine atoms                       | b_heavy      | Number of heavy-heavy bonds                 |
| a_nF              | Number of fluorine atoms                       | b_maxllen    | Maximum single-bond chain length            |
| a_nH              | Number of hydrogen atoms                       | b_rotN       | Number of rotatable bonds                   |
| a_nI              | Number of iodine atoms                         | b_rotR       | Fraction of rotatable bonds                 |
| a_nN              | Number of nitrogen atoms                       | b_single     | Number of single bonds                      |
| a_nO              | Number of oxygen atoms                         | b_triple     | Number of triple bonds                      |
| a_nP              | Number of phosphorus atoms                     | chi0         | Atomic connectivity index (order 0)         |
| a_nS              | Number of sulfur atoms                         | chi0v        | Atomic valence connectivity index (order 0) |
| balabanJ          | Balaban averaged distance sum connectivity     | chi0v_C      | Carbon valence connectivity index (order 0) |
| chi1              | Atomic connectivity index (order 1)            | chi0_C       | Carbon connectivity index (order 0)         |
| chi1v             | Atomic valence connectivity index (order 1)    | h_log_pbo    | Sum of log (1 + p-bond orders)              |
| chi1v_C           | Carbon valence connectivity index (order 1)    | h_mr         | Molar Refractivity                          |
| chi1_C            | Carbon connectivity index (order 1)            | h_pavgQ      | Average total charge (pH=7)                 |
| chiral            | Number of chiral centers                       | h_pKa        | Acidity (pH=7)                              |
| chiral_u          | Number of unconstrained chiral centers         | h_pKb        | Basicity (pH=7)                             |
| density           | Mass density (AMU/A**3)                        | h_pstates    | Entropic state count (pH=7)                 |
| diameter          | Largest vertex eccentricity in graph           | h_pstrain    | Protonation state strain energy (pH=7)      |
| FCharge           | Sum of formal charges                          | Kier1        | First kappa shape index                     |

|              |                                               |               |                                            |
|--------------|-----------------------------------------------|---------------|--------------------------------------------|
| GCUT_PEOE_0  | PEOE Charge GCUT (0/3)                        | Kier2         | Second kappa shape index                   |
| GCUT_PEOE_1  | PEOE Charge GCUT (1/3)                        | Kier3         | Third kappa shape index                    |
| GCUT_PEOE_2  | PEOE Charge GCUT (2/3)                        | KierA1        | First alpha modified shape index           |
| GCUT_PEOE_3  | PEOE Charge GCUT (3/3)                        | KierA2        | Second alpha modified shape index          |
| GCUT_SLOGP_0 | LogP GCUT (0/3)                               | KierA3        | Third alpha modified shape index           |
| GCUT_SLOGP_1 | LogP GCUT (1/3)                               | KierFlex      | Molecular flexibility                      |
| GCUT_SLOGP_2 | LogP GCUT (2/3)                               | lip_acc       | Lipinski Acceptor Count                    |
| GCUT_SLOGP_3 | LogP GCUT (3/3)                               | lip_don       | Lipinski Donor Count                       |
| GCUT_SMR_0   | Molar Refractivity GCUT (0/3)                 | lip_druglike  | Lipinski Druglike Test                     |
| GCUT_SMR_1   | Molar Refractivity GCUT (1/3)                 | lip_violation | Lipinski Violation Count                   |
| GCUT_SMR_2   | Molar Refractivity GCUT (2/3)                 | logP(o/w)     | Log octanol/water partition coefficient    |
| GCUT_SMR_3   | Molar Refractivity GCUT (3/3)                 | logS          | Log Solubility in Water                    |
| h_ema        | Sum of EHT acceptor strengths                 | mr            | Molar refractivity                         |
| h_emd        | Sum of EHT donor strengths                    | mutagenic     | Mutagenicity                               |
| h_emd_C      | Sum of EHT carbon donor strengths             | nmol          | Number of molecules                        |
| h_logD       | Octanol/water distribution coefficient (pH=7) | opr_brigid    | Oprea Rigid Bond Count                     |
| h_logP       | Octanol/water partition coefficient           | opr_leadlike  | Oprea Leadlike Test                        |
| h_logS       | Log solubility in water                       | opr_nring     | Oprea Ring Count                           |
| h_log_dbo    | Sum of log (1 + d-bond orders)                | opr_nrot      | Oprea Rotatable Bond Count                 |
| PC+          | Total positive partial charge                 | opr_violation | Oprea Violation Count                      |
| PC-          | Total negative partial charge                 | PEOE_VSA_PNEG | Total polar negative vdw surface area      |
| PEOE_PC+     | Total positive partial charge                 | PEOE_VSA_POL  | Total polar vdw surface area               |
| PEOE_PC-     | Total negative partial charge                 | PEOE_VSA_POS  | Total positive vdw surface area            |
| PEOE_RPC+    | Relative positive partial charge              | PEOE_VSA_PPOS | Total polar positive vdw surface area      |
| PEOE_RPC-    | Relative negative partial charge              | petitjean     | (diameter - radius) / diameter             |
| PEOE_VSA+0   | Total positive 0 vdw surface area             | petitjeanSC   | (diameter - radius) / radius               |
| PEOE_VSA+1   | Total positive 1 vdw surface area             | Q_PC+         | Total positive partial charge              |
| PEOE_VSA+2   | Total positive 2 vdw surface area             | Q_PC-         | Total negative partial charge              |
| PEOE_VSA+3   | Total positive 3 vdw surface area             | Q_RPC+        | Relative positive partial charge           |
| PEOE_VSA+4   | Total positive 4 vdw surface area             | Q_RPC-        | Relative negative partial charge           |
| PEOE_VSA+5   | Total positive 5 vdw surface area             | Q_VSA_FHYD    | Fractional hydrophobic vdw surface area    |
| PEOE_VSA+6   | Total positive 6 vdw surface area             | Q_VSA_FNEG    | Fractional negative vdw surface area       |
| PEOE_VSA-0   | Total negative 0 vdw surface area             | Q_VSA_FPNEG   | Fractional polar negative vdw surface area |
| PEOE_VSA-1   | Total negative 1 vdw surface area             | Q_VSA_FPOL    | Fractional polar vdw surface area          |
| PEOE_VSA-2   | Total negative 2 vdw surface area             | Q_VSA_FPOS    | Fractional positive vdw surface area       |
| PEOE_VSA-3   | Total negative 3 vdw surface area             | Q_VSA_FPPOS   | Fractional polar positive vdw surface area |

|                |                                            |            |                                       |
|----------------|--------------------------------------------|------------|---------------------------------------|
| PEOE_VSA-4     | Total negative 4 vdw surface area          | Q_VSA_HYD  | Total hydrophobic vdw surface area    |
| PEOE_VSA-5     | Total negative 5 vdw surface area          | Q_VSA_NEG  | Total negative vdw surface area       |
| PEOE_VSA-6     | Total negative 6 vdw surface area          | Q_VSA_PNEG | Total polar negative vdw surface area |
| PEOE_VSA_FHYD  | Fractional hydrophobic vdw surface area    | Q_VSA_POL  | Total polar vdw surface area          |
| PEOE_VSA_FNEG  | Fractional negative vdw surface area       | Q_VSA_POS  | Total positive vdw surface area       |
| PEOE_VSA_FPNEG | Fractional polar negative vdw surface area | Q_VSA_PPOS | Total polar positive vdw surface area |
| PEOE_VSA_FPOL  | Fractional polar vdw surface area          | radius     | Smallest vertex eccentricity in graph |
| PEOE_VSA_FPOS  | Fractional positive vdw surface area       | reactive   | Reactivity                            |
| PEOE_VSA_FPOS  | Fractional polar positive vdw surface area | rings      | Number of rings                       |
| PEOE_VSA_HYD   | Total hydrophobic vdw surface area         | RPC+       | Relative positive partial charge      |
| PEOE_VSA_NEG   | Total negative vdw surface area            | RPC-       | Relative negative partial charge      |
| SlogP          | Log Octanol/Water Partition Coefficient    | rsynth     | Synthetic Feasibility                 |
| SlogP_VSA0     | Bin 0 SlogP (-10 , -0.40]                  | vsa_acid   | VDW acidic surface area (A**2)        |
| SlogP_VSA1     | Bin 1 SlogP (-0.40,-0.20]                  | vsa_base   | VDW basic surface area (A**2)         |
| SlogP_VSA2     | Bin 2 SlogP (-0.20, 0.00]                  | vsa_don    | VDW donor surface area (A**2)         |
| SlogP_VSA3     | Bin 3 SlogP ( 0.00, 0.10]                  | vsa_hyd    | VDW hydrophobe surface area (A**2)    |
| SlogP_VSA4     | Bin 4 SlogP ( 0.10, 0.15]                  | vsa_other  | VDW other surface area (A**2)         |
| SlogP_VSA5     | Bin 5 SlogP ( 0.15, 0.20]                  | vsa_pol    | VDW polar surface area (A**2)         |
| SlogP_VSA6     | Bin 6 SlogP ( 0.20, 0.25]                  | Weight     | Molecular weight (CRC)                |
| SlogP_VSA7     | Bin 7 SlogP ( 0.25, 0.30]                  | weinerPath | Weiner path number                    |
| SlogP_VSA8     | Bin 8 SlogP ( 0.30, 0.40]                  | weinerPol  | Weiner polarity number                |
| SlogP_VSA9     | Bin 9 SlogP ( 0.40,10]                     | zagreb     | Zagreb index                          |
| SMR_VSA0       | Bin 0 SMR (0.000,0.110]                    | SMR        | Molar Refractivity                    |
| SMR_VSA2       | Bin 2 SMR (0.260,0.350]                    | SMR_VSA1   | Bin 1 SMR (0.110,0.260]               |
| SMR_VSA4       | Bin 4 SMR (0.390,0.440]                    | SMR_VSA3   | Bin 3 SMR (0.350,0.390]               |
| SMR_VSA6       | Bin 6 SMR (0.485,0.560]                    | SMR_VSA5   | Bin 5 SMR (0.440,0.485]               |
| TPSA           | Topological Polar Surface Area (A**2)      | SMR_VSA7   | Bin 7 SMR (0.560,10]                  |
| VAdjMa         | Vertex adjacency information (mag)         | VAdjEq     | Vertex adjacency information (equal)  |
| VDistMa        | Vertex distance magnitude index            | VDistEq    | Vertex distance equality index        |
| vsa_acc        | VDW acceptor surface area (A**2)           | vdw_area   | Van der Waals surface area (A**2)     |

**Table S3.** The 53 descriptors in MOE53.

| descriptor | descriptor   |
|------------|--------------|
| LabuteASA  | SlogP_VSA5   |
| PEOE_VSA1  | SlogP_VSA6   |
| PEOE_VSA2  | SlogP_VSA7   |
| PEOE_VSA3  | SlogP_VSA8   |
| PEOE_VSA4  | SlogP_VSA9   |
| PEOE_VSA5  | SlogP_VSA10  |
| PEOE_VSA6  | SlogP_VSA11  |
| PEOE_VSA7  | EState_VSA1  |
| PEOE_VSA8  | EState_VSA2  |
| PEOE_VSA9  | EState_VSA3  |
| PEOE_VSA10 | EState_VSA4  |
| PEOE_VSA11 | EState_VSA5  |
| PEOE_VSA12 | EState_VSA6  |
| PEOE_VSA13 | EState_VSA7  |
| SMR_VSA1   | EState_VSA8  |
| SMR_VSA2   | EState_VSA9  |
| SMR_VSA3   | EState_VSA10 |
| SMR_VSA4   | VSA_EState1  |
| SMR_VSA5   | VSA_EState2  |
| SMR_VSA6   | VSA_EState3  |
| SMR_VSA7   | VSA_EState4  |
| SMR_VSA8   | VSA_EState5  |
| SMR_VSA9   | VSA_EState6  |
| SlogP_VSA1 | VSA_EState7  |
| SlogP_VSA2 | VSA_EState8  |
| SlogP_VSA3 | VSA_EState9  |
| SlogP_VSA4 |              |



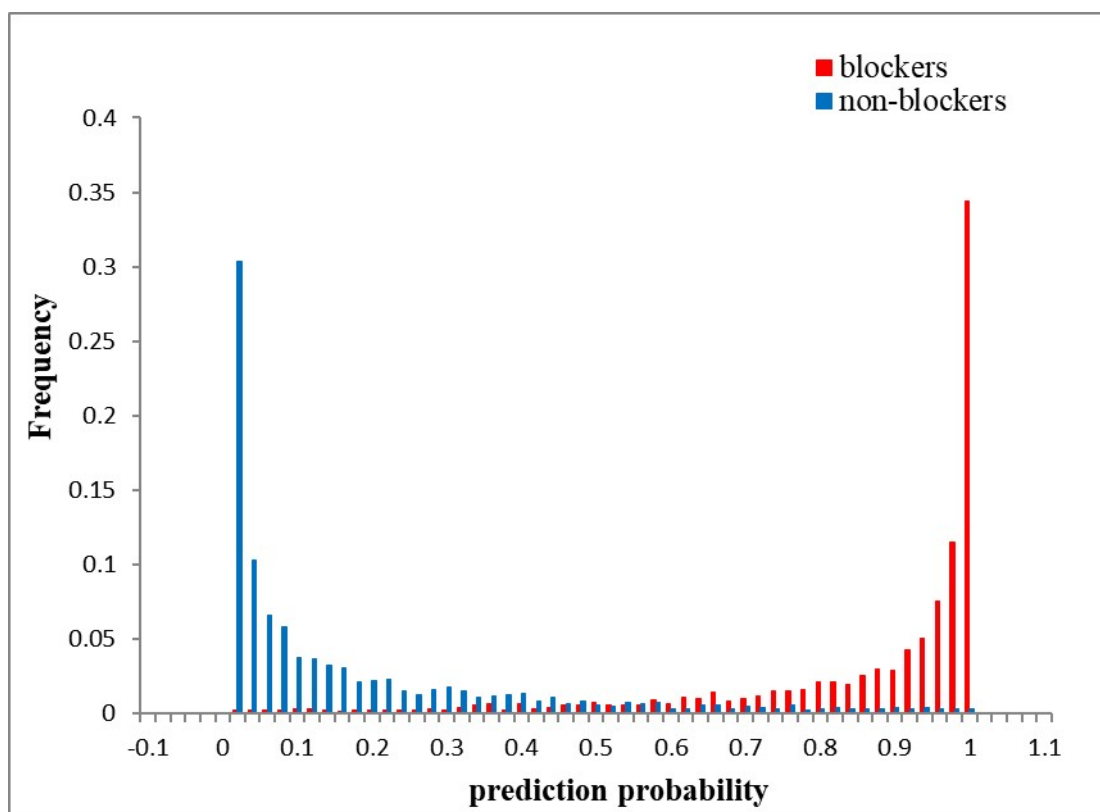

**Figure S3.** The prediction probability distribution of hERG blockers for Cai's dataset (at threshold = 10  $\mu$ M) by D-MPNN.

Cardiotoxicity caused by hERG blocked is one of the most significant aspects of ADMET properties<sup>9</sup>, and many physico-chemical properties are closely related to ADMET, So we applied six molecular descriptors to ADMET predictions, includes the number of rotatable bonds (NumRot), the number of hydrogen bond acceptor (HBD), molecular weight (MW), the number of molecular hydrogen bond donor (HBA), the octanol/water partition coefficient (LogP), the number of heavyatoms (NumHeavyAtoms). Comparing with blockers, non-blockers have more hydrogen bond acceptors and donors, while a small logP indicates that non-inhibitors are more hydrophilic. In general, for any descriptor, there is still a large overlap in the distribution of inhibitors and non-inhibitors, which indicates that no single molecular property can effectively distinguish between inhibitors and non-inhibitors.

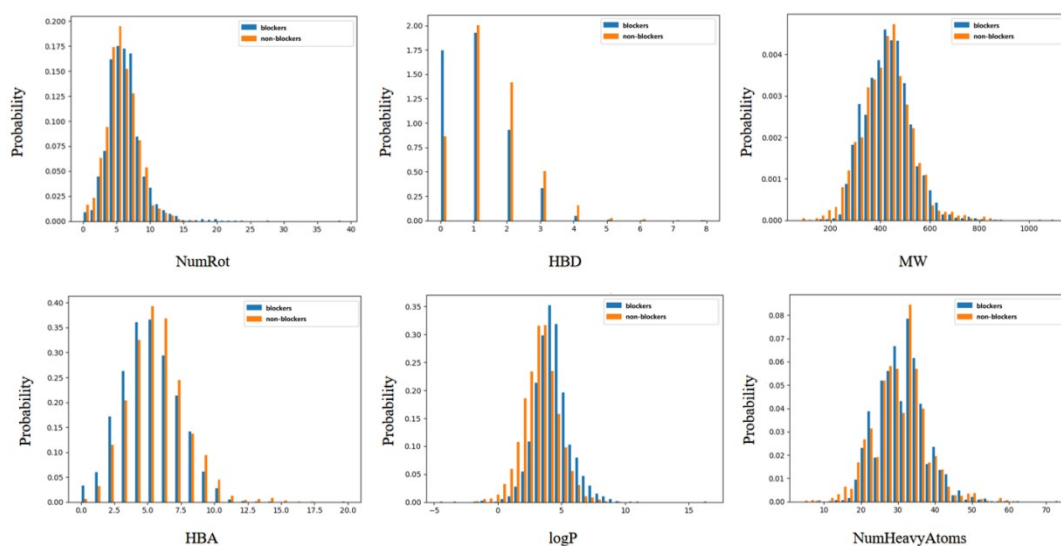

**Figure S4.** Comparing the chemical properties of blockers and non-blockers. NumRot: the number of rotatable bonds; HBD: the number of hydrogen bond acceptor; MW: molecular weight; HBA: the number of molecular hydrogen bond donor; LogP: the octanol/water partition coefficient; NumHeavyAtoms: the number of heavyatoms.

**Table S4.** The full name, bits and source of the descriptors.

| abbreviation | full                              | bits | refs. (DOI)                                                                       |
|--------------|-----------------------------------|------|-----------------------------------------------------------------------------------|
| ECFP4        | Extended Connectivity Fingerprint | 2048 | 10.1021/ci100050t                                                                 |
| ECFP6        | Extended Connectivity Fingerprint | 4096 | 10.1021/ci100050t                                                                 |
| FCFP4        | Functional class fingerprints     | 2048 | 10.1021/ci100050t                                                                 |
| MACCS        | Molecular Accession System keys   | 166  | 10.1021/ci010132r                                                                 |
| PubchemFP    | PubChem fingerprint               | 881  | <a href="#">list_fingerprints.pdf (ohio-state.edu)</a>                            |
| RDkit2D      | RDkit 2D normalized               | 200  | <a href="https://rdkit.org/docs/index.html">https://rdkit.org/docs/index.html</a> |
| MOE53        | Molecular Operating Environment   | 53   | 10.1186/s13321-018-0258-y                                                         |
| moe206       | Molecular Operating Environment   | 206  | 10.1007/s10822-012-9570-1                                                         |
| Mol2vec      | Mol2vec                           | 300  | 10.1021/acs.jcim.7b00616                                                          |

1. Cai, C.; Guo, P.; Zhou, Y.; Zhou, J.; Wang, Q.; Zhang, F.; Fang, J.; Cheng, F. Deep Learning-Based Prediction of Drug-Induced Cardiotoxicity. *J. Chem. Inf. Model.* **2019**, *59*, (3), 1073-1084.
2. Doddareddy, M. R.; Klaasse, E. C.; Shagufta; Ijzerman, A. P.; Bender, A. Prospective validation of a comprehensive in silico hERG model and its applications to commercial compound and drug databases. *ChemMedChem* **2010**, *5*, (5), 716-29.
3. Siramshetty, V. B.; Nguyen, D. T.; Martinez, N. J.; Southall, N. T.; Simeonov, A.; Zakharov, A. V. Critical Assessment of Artificial Intelligence Methods for Prediction of hERG Channel Inhibition in the "Big Data" Era. *J. Chem. Inf. Model.* **2020**, *60*, (12), 6007-6019.
4. Wang, S. Q.; Sun, H. Y.; Liu, H.; Li, D.; Li, Y. Y.; Hou, T. J. ADMET Evaluation in Drug Discovery. 16. Predicting hERG Blockers by Combining Multiple Pharmacophores and Machine Learning Approaches. *Mol. Pharm.* **2016**, *13*, (8), 2855-2866.
5. Ogura, K.; Sato, T.; Yuki, H.; Honma, T. Support Vector Machine model for hERG inhibitory activities based on the integrated hERG database using descriptor selection by NSGA-II. *Sci. Rep.* **2019**, *9*, (1), 12220.
6. Karim, A.; Lee, M.; Balle, T.; Sattar, A. CardioTox net: a robust predictor for hERG channel blockade based on deep learning meta-feature ensembles. *J. Cheminformatics* **2021**, *13*, (1), 60.
7. Ma, S.; Dai, Y. Principal component analysis based methods in bioinformatics studies. *Brief. Bioinformatics* **2011**, *12*, (6), 714-22.
8. Weaver, S.; Gleeson, M. P. J. J. o. M. G.; Modelling. The importance of the domain of applicability in QSAR modeling. **2008**, *26*, (8), 1315-1326.
9. Ferreira, L. L. G.; Andricopulo, A. D. ADMET modeling approaches in drug discovery. *Drug Discov. Today* **2019**, *24*, (5), 1157-1165.
